# Supplementary material for: Electrophysiological properties and heart rate variability of patients with thalassemia major in Jakarta, Indonesia
Source: PubMed Central journal article supplement (PMC9838856; doi:10.1371/journal.pone.0280401), 2023-01-13
Supplement: pone.0280401.s007.pdf [file pone.0280401.s007.pdf]

# PLOS ONE

## Electrophysiological Properties and Heart Rate Variability of Patients with Thalassemia Major in Jakarta, Indonesia --Manuscript Draft--

|                                                                                                                                                                                      |                                                                                                                                                                                                                                                                                                                                                                                                                                                                                                                                                                                                                                                                                                                                                                                                                                                                                                                                                                                                                                                                                                                                                                                                                                                                                                                                                                                                                                                                                                                                                                                                                                                                                                                                           |
|--------------------------------------------------------------------------------------------------------------------------------------------------------------------------------------|-------------------------------------------------------------------------------------------------------------------------------------------------------------------------------------------------------------------------------------------------------------------------------------------------------------------------------------------------------------------------------------------------------------------------------------------------------------------------------------------------------------------------------------------------------------------------------------------------------------------------------------------------------------------------------------------------------------------------------------------------------------------------------------------------------------------------------------------------------------------------------------------------------------------------------------------------------------------------------------------------------------------------------------------------------------------------------------------------------------------------------------------------------------------------------------------------------------------------------------------------------------------------------------------------------------------------------------------------------------------------------------------------------------------------------------------------------------------------------------------------------------------------------------------------------------------------------------------------------------------------------------------------------------------------------------------------------------------------------------------|
| <b>Manuscript Number:</b>                                                                                                                                                            | PONE-D-22-13754                                                                                                                                                                                                                                                                                                                                                                                                                                                                                                                                                                                                                                                                                                                                                                                                                                                                                                                                                                                                                                                                                                                                                                                                                                                                                                                                                                                                                                                                                                                                                                                                                                                                                                                           |
| <b>Article Type:</b>                                                                                                                                                                 | Research Article                                                                                                                                                                                                                                                                                                                                                                                                                                                                                                                                                                                                                                                                                                                                                                                                                                                                                                                                                                                                                                                                                                                                                                                                                                                                                                                                                                                                                                                                                                                                                                                                                                                                                                                          |
| <b>Full Title:</b>                                                                                                                                                                   | Electrophysiological Properties and Heart Rate Variability of Patients with Thalassemia Major in Jakarta, Indonesia                                                                                                                                                                                                                                                                                                                                                                                                                                                                                                                                                                                                                                                                                                                                                                                                                                                                                                                                                                                                                                                                                                                                                                                                                                                                                                                                                                                                                                                                                                                                                                                                                       |
| <b>Short Title:</b>                                                                                                                                                                  | Electrophysiological Properties of Thalassemia Major Patients                                                                                                                                                                                                                                                                                                                                                                                                                                                                                                                                                                                                                                                                                                                                                                                                                                                                                                                                                                                                                                                                                                                                                                                                                                                                                                                                                                                                                                                                                                                                                                                                                                                                             |
| <b>Corresponding Author:</b>                                                                                                                                                         | Rubiana Sukardi<br>RSUPN Dr Cipto Mangunkusumo: Rumah Sakit Dr Cipto Mangunkusumo<br>Jakarta, DKI Jakarta INDONESIA                                                                                                                                                                                                                                                                                                                                                                                                                                                                                                                                                                                                                                                                                                                                                                                                                                                                                                                                                                                                                                                                                                                                                                                                                                                                                                                                                                                                                                                                                                                                                                                                                       |
| <b>Keywords:</b>                                                                                                                                                                     | Thalassemia major; Electrocardiogram; QTc dispersion; Heart rate variability; VLP                                                                                                                                                                                                                                                                                                                                                                                                                                                                                                                                                                                                                                                                                                                                                                                                                                                                                                                                                                                                                                                                                                                                                                                                                                                                                                                                                                                                                                                                                                                                                                                                                                                         |
| <b>Abstract:</b>                                                                                                                                                                     | <p>Beta thalassemia major (TM) is a common hereditary disease in Indonesia. Iron overload due to regular transfusion may induce myocardial iron deposition leading to electrophysiological dysfunction and functional disorders of the heart. Ventricular arrhythmia is one of the most common causes of sudden cardiac death in thalassemia patients. This cross-sectional study of 62 TM patients aged 10-32 years in Cipto Mangunkusumo General Hospital was done to assess their electrophysiological properties and heart rate variability, including 24-hour Holter monitoring, signal averaged electrocardiogram (SAECG) for detection of ventricular late potential (VLP), and determination of heart rate variability (HRV). We also assessed their 12-lead ECG parameters, such as P wave, QRS complex, QT/QTc interval, QRS dispersion, and QT/QTc dispersion. Iron overload was defined by T2-star magnetic resonance (MR-T2*) values of less than 20 ms or ferritin level greater than 2500 ng/mL. Subjects were grouped accordingly. There were significant differences of QTc dispersion (<math>p = 0.026</math>) and deceleration capacity (<math>p = 0.007</math>) between MR-T2* groups. Multivariate analysis showed an inverse correlation between QTc dispersion and MR-T2* values. There was a proportional correlation between heart rate deceleration capacity in the low MR-T2* group (<math>p = 0.058</math>) and the high ferritin group (<math>p = 0.007</math>). No VLPs were detectable in any patients. In conclusion, prolonged QTc dispersion and decreased heart rate deceleration capacity were significantly correlated with greater odds of iron overload among patients with Thalassemia major.</p> |
| <b>Order of Authors:</b>                                                                                                                                                             | Rubiana Sukardi, MD<br>Pustika Amalia Wahidiyat, MD<br>Phebe Anggita Gultom, MD<br>Mokhammad Ikhsan, MD<br>Muhammad Yamin, MD<br>Simon Salim, MD<br>Mulyadi M Djer, MD                                                                                                                                                                                                                                                                                                                                                                                                                                                                                                                                                                                                                                                                                                                                                                                                                                                                                                                                                                                                                                                                                                                                                                                                                                                                                                                                                                                                                                                                                                                                                                    |
| <b>Additional Information:</b>                                                                                                                                                       |                                                                                                                                                                                                                                                                                                                                                                                                                                                                                                                                                                                                                                                                                                                                                                                                                                                                                                                                                                                                                                                                                                                                                                                                                                                                                                                                                                                                                                                                                                                                                                                                                                                                                                                                           |
| <b>Question</b>                                                                                                                                                                      | <b>Response</b>                                                                                                                                                                                                                                                                                                                                                                                                                                                                                                                                                                                                                                                                                                                                                                                                                                                                                                                                                                                                                                                                                                                                                                                                                                                                                                                                                                                                                                                                                                                                                                                                                                                                                                                           |
| <b>Financial Disclosure</b>                                                                                                                                                          | This research was supported by a Universitas Indonesia Research Grant, with internationally indexed [grant number NKB-1574/UN2.RST/HKP.05.00/2020], received by PAW. The funders had no role in study design, data collection and analysis, decision to publish, or preparation of the manuscript.                                                                                                                                                                                                                                                                                                                                                                                                                                                                                                                                                                                                                                                                                                                                                                                                                                                                                                                                                                                                                                                                                                                                                                                                                                                                                                                                                                                                                                        |
| Enter a financial disclosure statement that describes the sources of funding for the work included in this submission. Review the <a href="#">submission guidelines</a> for detailed |                                                                                                                                                                                                                                                                                                                                                                                                                                                                                                                                                                                                                                                                                                                                                                                                                                                                                                                                                                                                                                                                                                                                                                                                                                                                                                                                                                                                                                                                                                                                                                                                                                                                                                                                           |

requirements. View published research articles from [PLOS ONE](#) for specific examples.

This statement is required for submission and **will appear in the published article** if the submission is accepted. Please make sure it is accurate.

#### Unfunded studies

Enter: *The author(s) received no specific funding for this work.*

#### Funded studies

Enter a statement with the following details:

- Initials of the authors who received each award
- Grant numbers awarded to each author
- The full name of each funder
- URL of each funder website
- Did the sponsors or funders play any role in the study design, data collection and analysis, decision to publish, or preparation of the manuscript?
- **NO** - Include this sentence at the end of your statement: *The funders had no role in study design, data collection and analysis, decision to publish, or preparation of the manuscript.*
- **YES** - Specify the role(s) played.

\* typeset

#### Competing Interests

Use the instructions below to enter a competing interest statement for this submission. On behalf of all authors, disclose any [competing interests](#) that could be perceived to bias this work—acknowledging all financial support and any other relevant financial or non-financial competing interests.

This statement is **required** for submission and **will appear in the published article** if the submission is accepted. Please make sure it is accurate and that any funding sources listed in your Funding Information later in the submission form are also declared in your Financial Disclosure

The authors have declared that no competing interests exist.

statement.

View published research articles from [PLOS ONE](#) for specific examples.

#### **NO authors have competing interests**

Enter: *The authors have declared that no competing interests exist.*

#### **Authors with competing interests**

Enter competing interest details beginning with this statement:

*I have read the journal's policy and the authors of this manuscript have the following competing interests: [insert competing interests here]*

\* typeset

#### **Ethics Statement**

Enter an ethics statement for this submission. This statement is required if the study involved:

- Human participants
- Human specimens or tissue
- Vertebrate animals or cephalopods
- Vertebrate embryos or tissues
- Field research

Write "N/A" if the submission does not require an ethics statement.

General guidance is provided below. Consult the [submission guidelines](#) for detailed instructions. **Make sure that all information entered here is included in the Methods section of the manuscript.**

The study protocol was reviewed and approved by the institutional ethics committee of the Faculty of Medicine, Universitas Indonesia (No. 19-11-1274). Written informed consent was obtained from all participants in the study.

**Format for specific study types**

**Human Subject Research (involving human participants and/or tissue)**

- Give the name of the institutional review board or ethics committee that approved the study
- Include the approval number and/or a statement indicating approval of this research
- Indicate the form of consent obtained (written/oral) or the reason that consent was not obtained (e.g. the data were analyzed anonymously)

**Animal Research (involving vertebrate animals, embryos or tissues)**

- Provide the name of the Institutional Animal Care and Use Committee (IACUC) or other relevant ethics board that reviewed the study protocol, and indicate whether they approved this research or granted a formal waiver of ethical approval
- Include an approval number if one was obtained
- If the study involved *non-human primates*, add *additional details* about animal welfare and steps taken to ameliorate suffering
- If anesthesia, euthanasia, or any kind of animal sacrifice is part of the study, include briefly which substances and/or methods were applied

**Field Research**

Include the following details if this study involves the collection of plant, animal, or other materials from a natural setting:

- Field permit number
- Name of the institution or relevant body that granted permission

**Data Availability**

Authors are required to make all data underlying the findings described fully available, without restriction, and from the time of publication. PLOS allows rare exceptions to address legal and ethical concerns. See the [PLOS Data Policy](#) and [FAQ](#) for detailed information.

No - some restrictions will apply

A Data Availability Statement describing where the data can be found is required at submission. Your answers to this question constitute the Data Availability Statement and **will be published in the article**, if accepted.

**Important:** Stating 'data available on request from the author' is not sufficient. If your data are only available upon request, select 'No' for the first question and explain your exceptional situation in the text box.

Do the authors confirm that all data underlying the findings described in their manuscript are fully available without restriction?

**Describe where the data may be found in full sentences. If you are copying our sample text, replace any instances of XXX with the appropriate details.**

- If the data are **held or will be held in a public repository**, include URLs, accession numbers or DOIs. If this information will only be available after acceptance, indicate this by ticking the box below. For example: *All XXX files are available from the XXX database (accession number(s) XXX, XXX).*
- If the data are all contained **within the manuscript and/or Supporting Information files**, enter the following: *All relevant data are within the manuscript and its Supporting Information files.*
- If neither of these applies but you are able to provide **details of access elsewhere**, with or without limitations, please do so. For example:

*Data cannot be shared publicly because of [XXX]. Data are available from the XXX Institutional Data Access / Ethics Committee (contact via XXX) for researchers who meet the criteria for access to confidential data.*

*The data underlying the results presented in the study are available from (include the name of the third party*

The data underlying the results presented in the study are available from Phebe Anggita Gultom, MD, phebe.anggita0296@gmail.com

*and contact information or URL).*

- This text is appropriate if the data are owned by a third party and authors do not have permission to share the data.

\* typeset

Additional data availability information:

# Electrophysiological properties and heart rate variability of patients with thalassemia major in Jakarta, Indonesia

Running title: Electrophysiological properties and HRV

Rubiana Sukardi<sup>1\*</sup>, Pustika Amalia Wahidiyat<sup>2</sup>, Phebe Anggita Gultom<sup>3</sup>,  
Mokhammad Ikhsan<sup>4</sup>, Muhammad Yamin<sup>5</sup>, Simon Salim<sup>5</sup>, Mulyadi M. Djer<sup>4</sup>

<sup>1</sup>Integrated Cardiovascular Service, Univeristy of Indonesia, Cipto Mangunkusumo General Hospital, Jakarta

<sup>2</sup>Department of Child Health, Hematology-Oncology Division, University of Indonesia, Cipto Mangunkusumo General Hospital, Jakarta

<sup>3</sup>Faculty of Medicine University of Indonesia

<sup>4</sup>Department of Child Health, Cardiology Division, University of Indonesia, Cipto Mangunkusumo General Hospital, Jakarta

<sup>5</sup>Department of Internal Medicine, Cardiology Division, University of Indonesia, Cipto Mangunkusumo General Hospital, Jakarta

\*Corresponding author

Email: [rubiana\\_sukardi@yahoo.com](mailto:rubiana_sukardi@yahoo.com) (RS)

<sup>¶</sup>These authors contributed equally to the work

## Abstract

Beta thalassemia major (TM) is a common hereditary disease in Indonesia. Iron overload due to regular transfusion may induce myocardial iron deposition leading to electrophysiological dysfunction and functional disorders of the heart. Ventricular arrhythmia is one of the most common causes of sudden cardiac death in thalassemia patients. This cross-sectional study of 62 TM patients aged 10-32 years in Cipto Mangunkusumo General Hospital was done to assess their electrophysiological properties and heart rate variability, including 24-hour Holter monitoring, signal averaged electrocardiogram (SAECG) for detection of ventricular late potential (VLP), and determination of heart rate variability (HRV). We also assessed their 12-lead ECG parameters, such as P wave, QRS complex, QT/QTc interval, QRS dispersion, and QT/QTc dispersion. Iron overload was defined by T2-star magnetic resonance (MR-T2\*) values of less than 20 ms or ferritin level greater than 2500 ng/mL. Subjects were grouped accordingly. There were significant differences of QTc dispersion ( $p = 0.026$ ) and deceleration capacity ( $p = 0.007$ ) between MR-T2\* groups. Multivariate analysis showed an inverse correlation between QTc dispersion and MR-T2\* values. There was a proportional correlation between heart rate deceleration capacity in the low MR-T2\* group ( $p = 0.058$ ) and the high ferritin group ( $p = 0.007$ ). No VLPs were detectable in any patients. In conclusion, prolonged QTc dispersion and decreased heart rate deceleration capacity were significantly correlated with greater odds of iron overload among patients with Thalassemia major.

## Introduction

Beta thalassemia major (TM) is one of the most common occurrences in hereditary hemoglobinopathy, due to deficiency or absence of  $\beta$ -globin subunits, which leads to ineffective erythropoiesis. Diagnosis of TM is usually determined at the age of 1-2 years.[1,2]



Lifelong blood transfusions, along with extravascular hemolysis and increased intestinal absorption of iron contribute to iron overload in such patients. Consequently, iron chelation therapy is of utmost importance. However, chelation may not be sufficient to prevent overload and iron-related toxicity. The heart is one of the main organs affected by iron toxicity.[3,4] The proposed mechanisms of TM-related cardiomyopathy include membrane damage by lipid peroxidase, mitochondrial respiratory chain enzyme damage, electrical activity disruptions, cardiac fibrosis, and gene expression alterations. These mechanisms can change both cardiac rhythm and structures.[5,6]

The two most common electrophysiological abnormalities in TM patients are disturbances in cardiac autonomic function and ventricular arrhythmia. Conventional electrocardiography (ECG) has limited role to assess cardiac autonomic function and ventricular arrhythmia since the majority of patients with asymptomatic cardiomyopathy have normal ECG. Although T2-star magnetic resonance (MR-T2\*) has been demonstrated as promising for early diagnosis of iron overload cardiomyopathy, it cannot be used to evaluate cardiac autonomic disturbances or ventricular arrhythmias. Furthermore, its use is also limited by lack of availability and high cost, particularly in low- and middle-income countries.

Recently, Holter monitoring and signal averaged electrocardiogram (SAECG) have been used to determine cardiac autonomic function and ventricular late potential as predictors of ventricular arrhythmias in patients with post-myocardial infarction and heart failure.[7,8] Despite their clinical significance, there have been a limited number of cross-sectional studies investigating Holter monitoring and SAECG in TM patients [4,9]. As such, we aimed to compare electrophysiological properties of TM patients with and without iron overload at Cipto Mangunkusumo General Hospital, Jakarta using 24-hour Holter monitoring and SAECG measurements.

# **Materials and Methods**

## **Study Protocol**

We conducted a cross-sectional study involving 62 TM patients aged 10-32 years at the Pediatric Hematology outpatient clinic in Cipto Mangunkusumo General Hospital, Jakarta. Subjects received regular blood transfusions and various types of iron chelation. Patients with heart failure, acute or chronic inflammatory diseases, metabolic disorders, and those taking anti-arrhythmic and/or cardiovascular medication affecting sympatho-vagal balance in the past 3 months were excluded. The study protocol was reviewed and approved by the institutional ethics committee of the Faculty of Medicine, Universitas Indonesia (No. 19-11-1274). Written informed consent was obtained from all participants in the study.

Subjects underwent history-taking, physical examinations, and blood tests. We collected demographic data as well as information on age at diagnosis, drug(s) usage, and blood transfusion frequency. We routinely measured blood pressure and heart rate measurements. The most recent ferritin level and MR-T2\* data were evaluated within three months prior to data collection from medical records. Subsequently, patients were grouped according to their ferritin levels as well as their MR-T2\* values. At the time of entry into the study, a 24-hour Holter ECG recording for HRV analysis and SAECG for ventricular late potential were collected.

## **A 24-Hour Holter Monitoring Assessment**

### **Conduction Pattern Assessment**

We used the Vasomedical-BIOX™ 1306 ultra-compact 12-channel ECG (25 mm/second, amplitude of 10 mm/mV) with silver chloride electrodes. ECG waves were measured using EP Calipers application for Mac. Recordings were done at rest in a quiet room. Parameters used in this study were P wave duration, QRS duration, PR interval, QRS dispersion,

QT interval, QTc interval, QT dispersion, and QTc dispersion. P wave interval was measured from the beginning to the end of the P wave. PR interval was measured from the beginning of the P wave to the beginning of Q wave. QRS duration was measured from the beginning of the Q wave to the end of the S wave. QT interval was measured from the beginning of the QRS complex until the end of the T wave, and the end of the T wave was determined by the tangent method. QT interval was corrected for heart rate using Bazett formula ( $QTc = QT/\sqrt{R-R}$  interval).[10] QRS, QT, and QTc dispersion were calculated by subtracting maximum durations of QRS, QT, and QTc in each lead with the minimum durations of QRS, QT, and QTc interval. All the parameters were measured from an average of three consecutive beats, mostly in lead II and V1. QRS, QT, and QTc dispersion were calculated manually. Heart rate deceleration capacity was defined as the expression of extrinsic neural control of the heart to decelerate the rate and measured quantitatively using a 24-hour ambulatory electrocardiogram.[11,12]

### **Heart Rate Variability**

Heart rate variability was measured using Vasomedical-BIOX™ 1306 ultra compact 12-channel ECG 24- hour Holter Recorder. We assessed the following parameters: standard deviation of all normal sinus RR intervals for 24-hour (SDNN), standard deviation of the averaged normal sinus RR intervals in all 5-minute segments (SDANN), root mean square of each successful RR interval difference (rMSSD), the percentage of successive normal sinus RR intervals >50 ms (pNN50), and the percentage of pNN50.[13] Patients were asked to maintain their daily routine activities during the recording.

### **Presence of Ectopic Beat**

The presence of ectopic beat, such as premature atrial contraction and ventricular premature beat, was evaluated from a 24-hour Holter recording.

## **SAECG**

We performed Vasomedical BIOX™ 1303 ultra compact 3-channel ECG Holter Recorder for SAECG and silverchloride electrode. Recordings were accepted for analysis if two of the following criteria were met: number of beats averaged >250, and mean noise levels were <1.0  $\mu\text{V}$  for 25 Hz filters or <0.7  $\mu\text{V}$  for 40 Hz filters. SAECG parameters were considered abnormal if total QRS duration was >114 ms, duration of low amplitude signals lower than 40  $\mu\text{V}$  (LAS40) were >38 ms, and root mean square voltage of signals in the last 40 ms of the high frequency QRS intervals (RMS40) were <20  $\mu\text{V}$ . [14] An SAECG study was considered positive for VLPs if two of these three parameters were abnormal, according to previous recommendations. [15] During SAECG assessment, the patient was lying down for fifteen minutes in a quiet room and all metal accessories had been removed.

## **Statistical Analysis**

We performed descriptive and analytical statistic using SPSS Statistics 23.0. Continuous data are presented as mean and standard deviation, or median and minimum and maximum values as appropriate. We used independent t-test for homogenous data distribution and Mann-Whitney test for heterogenous data distribution. A p-value less than 0.05 was statistically significant. Multivariate analysis was performed for parameters with p-values less than 0.2. All parameters were compared between ferritin status groups (< 2500 ng/mL and  $\geq$ 2500 ng/mL) as well as between MR-T2\* status groups (<20 ms and  $\geq$ 20 ms).

## **Results**

### **Demographic Characteristics**

Of 62 subjects, most were in the 16-20-year age group and male (Table 1). Fifty-seven

(91.9%) subjects had high levels of ferritin ( $\geq 2500$  ng/mL), while only 19 (30.6%) had MR-T2\* values less than 20 ms. Most subjects received deferiprone (61.3%) for chelation. Mean age at first transfusion was 10 months, and mean duration of transfusion was 16.8 years.

**Table 1.** Demographic characteristics of patients with thalassemia major

| Characteristics                                           | (N = 62)                |
|-----------------------------------------------------------|-------------------------|
| Age in years, mean (SD)                                   | 18.7 (4.7)              |
| Age by group, n (%)                                       |                         |
| • 10-15 years                                             | 17 (27.4)               |
| • 16-20 years                                             | 25 (40.3)               |
| • $\geq 21$ years                                         | 20 (32.3)               |
| Sex, n (%)                                                |                         |
| • Male                                                    | 35 (56.5)               |
| • Female                                                  | 27 (43.5)               |
| Ferritin in ng/mL, median (min-max)                       |                         |
| • $< 2500$                                                | 1577.1 (366.2-1878.3)   |
| • $\geq 2500$                                             | 7310.9 (2577.4-29206.1) |
| MR-T2* in ms, median (min-max)                            |                         |
| • $< 20$                                                  | 13.7 (5-19.7)           |
| • $\geq 20$                                               | 31.9 (20.3-42.1)        |
| Chelating agent, n (%)                                    |                         |
| • Deferoxamine                                            | 5 (8.1)                 |
| • Deferiprone                                             | 38 (61.3)               |
| • Deferasirox                                             | 8 (12.9)                |
| • Combination                                             | 10 (16.1)               |
| Age at first transfusion in months, median (min-max)      | 10.5 (3.1-108)          |
| Duration of transfusion in years, mean (SD)               | 16.8 (5.6)              |
| Frequency of transfusion in every n day, median (min-max) | 14 (7-56)               |
| Systolic blood pressure in mmHg, mean (SD)                | 105 (15)                |
| Diastolic blood pressure in mmHg, mean (SD)               | 65 (12)                 |

## Conduction Pattern Assessment

Forty-nine patients underwent 12-lead ECG (3 refused, 10 were out of reach). QRS duration was wider in the low ferritin group compared to the high ferritin group, albeit not clinically important (85.5 ms vs. 73.4 ms, respectively,  $p = 0.045$ ). QTc dispersion was higher in the low MR-T2\* group than in the high MR-T2\* group, but the difference was also not clinically important (72 ms vs 53.2 ms, respectively,  $p = 0.026$ ) (Table 2).

**Table 2.** Conduction patterns in the ferritin and MR-T2\*

| Variable                          | Ferritin <2500 ng/mL<br>(n = 4) | Ferritin ≥2500 ng/mL<br>(n = 45) | p value | MR-T2* ≥20 ms<br>(n = 32) | MR-T2* <20 ms<br>(n = 17) | p value |
|-----------------------------------|---------------------------------|----------------------------------|---------|---------------------------|---------------------------|---------|
| P duration, ms<br>(median, range) | 66.5 (57.0-70.0)                | 64.0 (34.0-97.0)                 | 0.660   | 64.0 (34.0-94.0)          | 59.0 (37.0-97.0)          | 0.455   |
| QRS duration,<br>ms (mean, SD)    | 85.5 (18.4)                     | 73.4 (10.6)                      | 0.045*  | 75.6 (12.9)               | 72.2 (8.6)                | 0.333   |
| PR interval, ms<br>(mean, SD)     | 130.0 (14.8)                    | 130.8 (18.3)                     | 0.935   | 131.5 (19.4)              | 129.3 (15.2)              | 0.691   |
| QT interval, ms<br>( mean, SD)    | 340.3 (29.1)                    | 330.9 (28.3)                     | 0.530   | 330.2 (29.3)              | 334.8 (26.1)              | 0.609   |
| QTc interval, ms<br>(mean, SD)    | 419.3 (26.7)                    | 430.7 (22.4)                     | 0.343   | 428.6 (19.7)              | 432.1 (28.6)              | 0.669   |
| QRS dispersion*,<br>ms (mean, SD) | 36.3 (5.0)                      | 27.4 (11.5)                      | 0.136*  | 28.0 (11.4)               | 28.2 (11.6)               | 0.953   |
| QT dispersion*,<br>ms (mean, SD)  | 60.9 (22.4)                     | 45.6 (22.6)                      | 0.197*  | 42.7 (21.3)               | 54.3 (23.9)               | 0.089*  |
| QTc dispersion*,<br>ms (mean, SD) | 77.3 (30.2)                     | 58.1 (28.2)                      | 0.200   | 53.2 (24.5)               | 72.0 (32.1)               | 0.026** |

#Statistically significant if p-value < 0.05; \*p-value < 0.20 were included in multivariate analysis

## Heart Rate Variability and Presence of Ectopic Beat

On HRV analysis, only heart rate deceleration capacity was lower in the low MR-T2\* group than in the highgroup, although the difference was not clinically important (4.1 vs 5.2, respectively, p = 0.007) (Table 3).

**Table 3.** Heart rate variability performance in the ferritin and MR-T2\* groups

| Measurement                                         | Ferritin <2500<br>ng/mL (n = 3) | Ferritin ≥2500<br>ng/mL (n = 45) | p      | MR-T2* ≥20 ms<br>(n = 31) | MR-T2* < 20 ms<br>(n = 17) | p       |
|-----------------------------------------------------|---------------------------------|----------------------------------|--------|---------------------------|----------------------------|---------|
| Heart rate, mean (SD)                               | 85.0 (5.3)                      | 91.2 (9.6)                       | 0.278  | 89.6 (10.1)               | 93.1 (8.2)                 | 0.222   |
| SDNN, mean (SD)                                     | 124.3 (16.2)                    | 108.2 (31.5)                     | 0.388  | 113.7 (30.3)              | 101.2 (31.2)               | 0.185*  |
| SDANN, median (range)                               | 109.8 (100.6-<br>132.5)         | 99.5 (44.1-339.3)                | 0.869  | 109.3 (49.2-<br>339.3)    | 90.2 (44.1- 264.2)         | 0.123*  |
| rMSSD, median (range)                               | 51.8 (18.0-62.5)                | 36.6 (11.9-105.4)                | 0.183* | 38.7 (11.9-105.4)         | 19.2 (12.8-63.4)           | 0.146*  |
| pNN50, median (range)                               | 0.22 (0.13-0.25)                | 0.04 (0-0.36)                    | 0.082* | 0.08 (0-0.36)             | 0.02 (0-0.26)              | 0.269   |
| pNN50, %, median,<br>(range)                        | 21.92 (12.86-<br>24.90)         | 4.10 (0.07-36.38)                | 0.066* | 5.64 (0.07-36.38)         | 2.14 (0.21-26.34)          | 0.419   |
| T wave alternans, median<br>(range)                 | 0.51 (0.42-0.81)                | 0.45 (-0.16-0.932)               | 0.297  | 0.45 (-0.26-0.83)         | 0.46 (-0.18-0.93)          | 0.929   |
| Heart rate deceleration<br>capacity, median (range) | 5.8 (5.3-6.5)                   | 4.9 (0-6.5)                      | 0.058* | 5.3 (0-6.5)               | 4.1 (2.0-5.9)              | 0.007** |

SDNN: standard deviation of all normal sinus RR interval for 24 hours; SDANN: standard deviation of the averaged RR intervals for all 5-minute segments, rMSSD: root mean square of each successful RR interval difference; pNN50: successful RR intervals that differ more than 50 ms, and percentage of pNN50.

\*p value < 0.20 were included in multivariate analysis.

## SAECG

No difference in SAECG parameters were observed between ferritin level groups or MR-T2\* groups (Table 4).

**Table 4.** SAECG measurements in the ferritin and MR-T2\* groups

| SAECG                                                               | Ferritin < 2500 ng/mL<br>(n = 4) | Ferritin ≥ 2500<br>ng/mL<br>(n = 55) | P      | MR-T2* ≥20<br>ms      | MR-T2* <20 ms     | P      |
|---------------------------------------------------------------------|----------------------------------|--------------------------------------|--------|-----------------------|-------------------|--------|
| Ventricular late potential                                          |                                  |                                      |        |                       |                   |        |
| Standard QRS (QRS <sub>D</sub> ),<br>median(range)                  | 64.5 (64-81.0)                   | 63.0 (60.0 - 72.0)                   | 0.257  | 63.5 (60.0 -<br>81.0) | 65.0 (60.0-72.0)  | 0.165* |
| Total QRS (QRS <sub>T</sub> ),mean<br>(SD)                          | 96.3 (8.1)                       | 91.3 (5.9)                           | 0.117* | 91.6 (6.2)            | 91.6 (6.0)        | 0.979  |
| Under 40uV (LAS <sub>40</sub> ,<br>D <sub>40</sub> , median (range) | 23.5 (16.0-37.0)                 | 19.0 (6.0-34.0)                      | 0.167* | 19.0 (6.0-37.0)       | 18.0 (6.0-34.0)   | 0.564  |
| Last 40ms (RMS <sub>40</sub> ,<br>V <sub>40</sub> ), median (range) | 68.4 (22.7-71.4)                 | 90.0 (24.7-289.5)                    | 0.131* | 80.8 (22.7-287.9)     | 79.5 (34.9-289.5) | 0.858  |

*VLP positive if two of these three parameters are met: QRS<sub>T</sub> >114 ms, LAS<sub>40</sub> >38 ms, and RMS<sub>40</sub> <20 μV.*

## Multivariate Analysis

Both QTc dispersion and heart rate deceleration capacity were associated with MR-T2\* status (Table 5). Patients with lower QTc dispersion had a greater likelihood of high MR-T2\* level, as did those with higher heart rate deceleration capacity.

**Table 5.** Multivariate analysis between MR-T2\* values and electrophysiological properties

| Variable                            | Adjusted OR | 95% CI      |
|-------------------------------------|-------------|-------------|
| QTc dispersion                      | 0.971       | 0.948-0.996 |
| Heart rate deceleration<br>capacity | 1.606       | 1.010-2.556 |

## Discussion

This study explored the relationship of electrophysiological properties and heart rate variability with iron overload in 62 patients with thalassemia major in Indonesia. The results indicate that prolonged QTc dispersion and decreased heart rate deceleration capacity were significantly correlated with greater odds of iron overload among TM patients.

Serum ferritin level is commonly used to monitor iron concentration in the body, but MR-T2\* is still considered to be the gold standard to quantify iron concentration in myocardial tissue.[16] Lower MR-T2\* value is a result of higher iron concentration in myocardial tissue. MR-T2\* values < 20 ms indicate cardiac siderosis, while MR-T2\* values < 10 ms indicate a higher risk of symptomatic heart failure and mortality. MR-T2\* values ranging from 10-20 ms are associated with reduced left ventricular ejection fraction (LVEF) and arrhythmia.[17] Most of our subjects had high serum ferritin level. This finding might have been related to poor compliance to taking chelating drugs, subjective feeling towards the drugs, and lack of drug availability [18]. However, more than 60% of subjects had normal MR-T2\* values, possibly because the majority of our patients received deferiprone. Based on previous studies, deferiprone is known to have specific action on cardiac siderosis and is superior to subcutaneous deferoxamine in preventing morbidity and mortality due to cardiac siderosis. [19-22]

A 12-lead ECG has been used as one of early diagnostic tools for analyzing electrical conduction disturbances. [19, 23] QTc interval is reasonably specific to diagnose iron overload cardiomyopathy. Previous studies revealed that increasing iron stores in men correlated with prolonged QTc interval and may induce cardiac arrhythmias, including torsades de pointes, ventricular fibrillation, and sudden cardiac death. [24,25] We found no significant differences in QT and QTc intervals between ferritin groups nor between MR-T2\* groups. Heart rate-corrected QT intervals were considered prolonged if >450 ms for males and >460 ms for females.[26] Using these definitions, 12.2% of our patients had prolonged QTc. QTc prolongation was found to correlate with iron status (ferritin) and cardiac iron (MR-T2\*) [24], but we found no such correlations between QTc and iron status in our study. This observation might have been because subjects' ferritin or iron status was obtained within three months prior to the study, therefore, the iron status obtained may not have reflected the current or recent condition of the patients.



QT dispersion (QTd) and QTc dispersion are also sensitive for predicting repolarization abnormality. QTc dispersion is one of the surrogate markers for ventricular repolarization homogeneity. An animal study showed that myocardial iron overload could reduce sodium inward and potassium transient outward currents, possibly contribute to heterogeneity [27]. Previous studies showed that the prevalence of increased QTc dispersion > 65 ms increased the risk of ventricular arrhythmias. [28,29] In our study, this condition was found in 31% of patients with high ferritin (vs 50% in the low ferritin group) and in 53% of patients with low MR-T2\* (vs 22% in the high MR-T2\*).

Previous studies investigated QT parameters in healthy people and TM patients.[24,29,30] Demircan et al. and Kayrak et al. reported prolonged P waves, QT and T peak-to-end dispersions, T peak-to-end intervals, and increased T peak-to-end/QT ratios, regardless of MR-T2\* status.[30,31] In addition, Najib et al. reported prolonged QTc interval in subjects with MR-T2\* values < 20 ms.[24] Our results were in general agreement with reports by Demircan et al. and Kayrak et al., who showed no relationship between QT parameters and MR-T2\* and ferritin level, except for QTc dispersion, which was prolonged in the MR-T2\* <20ms group.[30,31]

To the best of our knowledge, studies on HRV assessment in TM patients have been limited. HRV shows changes of autonomic activity and its impact on heart function. TM patients with chronic anemia may have reduced HRV, which subsequently lead to tachycardia and a sustained decrease of autonomic fluctuations.[32, 33] Reduced sympathetic activity causes decreases in blood pressure and HRV.[34] Previous cross-sectional studies concluded that HRV parameters were decreased significantly in TM patients, but had no correlation with any hematologic or biochemistry parameters.[9,35] Decreased HRV, even when patients show no symptoms, correlates with regional wall motion abnormality.[35]

In our study, there were no statistically significant differences in all HRV parameters

between ferritin groups and between MR-T2\* groups. However, a comparison to HRV data based on age in normal subjects revealed that the HRV of our TM patients was below the normal range.[13] Heart rate deceleration capacity in 24 hours is a quantitative evaluation of vagal tone intensity. Reduced deceleration capacity means reduced vagal excitability, which correspondingly downgrades its protection of the human body and increases sudden cardiac death risk.[36] Our low MR-T2\* patients and high ferritin level patients had lower deceleration capacity. Multivariate analysis also revealed an inverse correlation between heart rate deceleration capacity and MR-T2\* values.

SAECG has been used to assess ventricular tachycardia as the underlying substrate in up to 5% of suddencardiac deaths among TM patients. VLP measurement is a tool to assess for the presence of low voltage areas in the myocardium, which are mainly caused by infarction. In thalassemia patients, infarction may occur due to chronic anemia and iron deposits in the myocardium. The prevalence of VLP among the TM population varies between 3-31%.[37,38]

Contrary to those studies, none of our patients had detectable VLP using SAECG. We also found no correlation of myocardial iron concentration, as reflected by MR-T2\*, with the existence of VLP based on SAECG. Late gadolinium enhancement CMR examination may be done to evaluate fibrotic areas in myocardial tissue, but it is very expensive, invasive, and has limited availability.[39] Based on this study, we cannot propose SAECG as a routine screen for early diagnosis of ventricular arrhythmia, however, a simple examination such as electrocardiography to determine prolonged QTc interval and QTc dispersion might be sensitive enough to predict early ventricular arrhythmia.

There were several limitations to this study. First, MR-T2\* examination was not performed in conjunction with the electrocardiography study. There was a one-year gap between MR-T2\* examination and the start of this study. We did not repeat MR-T2\* due to limited funds. However, according to previous studies, MR-T2\* data would not differ much within a

year.[40,41] Second, the number of participants in the ferritin groups were not balanced, as it was difficult to find subjects with ferritin levels <2500 ng/ml because of their compliance in taking chelating drugs. As such, medication adherence needs to be monitored. A prospective cohort study is needed for further investigation.

## **Conclusions**

In our study, prolonged QTc dispersion and decreased heart rate deceleration capacity correlate with low MR-T2\* as a reliable marker for myocardial iron deposition.

## **Acknowledgement**

None.

## **Disclosures**

The Authors declare that there is no conflict of interest.

## References

1. Nienhuis AW, Nathan DG. Pathophysiology and clinical manifestations of the B thalassemias. *Cold Spring Harb Perspect Med* 2012;2:(a011726).
2. Pennell DJ, Udelson JE, Arai AE, Bozkurt B, Cohen AR, Galanello R, et al. American Heart Association Committee on Heart Failure and Transplantation of the Council on Clinical Cardiology and Council on Cardiovascular Radiology and Imaging. Cardiovascular function and treatment in  $\beta$ -thalassemia major: a consensus statement from the American Heart Association. *Circulation* 2013;128:281–308.
3. Kolios M, Korantzopoulos P, Vlahos AP, Kapsali E, Briasoulis E, Goudevenos JA. Electrocardiographic abnormalities and arrhythmic risk markers in adult patients with beta thalassemia major. *Int J Cardiol* 2016;221:932–6.
4. Oztarhan K, Delibas Y, Salcioglu Z, Kaya G, Bakari S, Bornaun H, et al. Assessment of cardiac parameters in evaluation of cardiac functions in patients with thalassemia major. *Pediatr Hematol Oncol* 2012;29:220–34.
5. Berdoukas V, Coates TD, Cabantchik ZI. Iron and oxidative stress in cardiomyopathy in thalassemia. *Free Radic Biol Med* 2015;88:3–9.
6. Lekawanvijit S, Chattipakorn N. Iron overload thalassemic cardiomyopathy: iron status assessment and mechanisms of mechanical and electrical disturbance due to iron toxicity. *Can J Cardiol* 2009;25:213–8.
7. Romberg D, Langel J, Theres H, Kohlstrung P, Bethge K, Stangl K, Baumann G. Correlations between SAECG and HRV parameters in individual patients after myocardial infarction. *Comput Cardio* 1996;10:321–3.
8. Patel VN, Pierce BR, Bodapati RK, Brown DL, Ives DG, Stein PK. Association of Holter-derived heart rate variability parameters with the development of congestive heart failure in the Cardiovascular Health Study. *JACC Heart Fail* 2017;5:423–31.
9. Postema PG, Wilde AAM. The measurement of QT interval. *Curr Cardiol Rev.* 2014;10(3):287-94.

10. Franzoni F, Galetta F, Di Muro C, Buti G, Pentimone F, Santoro G. Heart rate variability and ventricular late potentials in  $\beta$ -thalassemia major. *Haematologica* 2004;89:233-4.
11. Hu W, Jin X, Zhang P, Yu Q, Yin G, Lu Y, et al. Deceleration and acceleration capacities of heart rate associated with heart failure with high discriminating performance. *Sci Rep* 2016;6:23617.
12. Arsenos P, Manis G. Deceleration capacity of heart rate: two new methods of computation. *Biomed Signal Process Control* 2014;14:158–63.
13. Umetani K, Singer DH, McCraty R, Atkinson M. Twenty-four hour time domain heart rate variability and heart rate: Relations to age and gender over nine decades. *J Am Coll Cardiol* 1998;31:593–601.
14. Gatzoulis KA, Arsenos P, Trachanas K, Dilaveris P, Antoniou C, Tsiachris D, et al. Signal-averaged electrocardiography: past, present, and future. *J Arrhythm* 2018;34:222–9.
15. Rejdak K, Rubaj A, Głowniak A, Furmanek K, Kutarski A, Wysokiński A, Stelmasiak Z. Analysis of ventricular late potentials in signal-averaged ECG of people with epilepsy. *Epilepsia* 2011; 52:2118–24.
16. Mishra AK, Tiwari A. Iron overload in Beta thalassaemia major and intermedia patients. *Maedica (Bucur)* 2013;8:328–32.
17. Taher AT, Saliba AN, Taher AT, Saliba AN. Iron overload in thalassemia: different organs at different rates. *Hematology Am Soc Hematol Educ Program* 2017:265–71.
18. Wahidiyat PA, Sari TT, Rahmartani LD, Setianingsih I, Iskandar SD, Pratanata AM, et al. An insight into Indonesian current thalassaemia care and challenges. *ISBT Sci Ser* 2015;15(3):334-41
19. Detterich J, Noetzli L, Dorey F, Bar-cohen Y, Harmatz P, Coates T, et al. Electrocardiographic consequences of cardiac iron overload in thalassemia major. *Am J Hematol* 2012;87:139–44.
20. Musallam KM, Taher AT. Deferiprone or deferasirox for cardiac siderosis in beta-thalassemia major. *Haematologica* 2011;96(2):5–6.
21. Pepe A, Meloni A, Capra M, Cianciulli P, Prossomariti L, Malaventura C, et al. Deferasirox, deferiprone and desferrioxamine treatment in thalassemia major patients: cardiac iron and function comparison determined by quantitative magnetic resonance imaging. *Haematologica* 2011;96(1):41–7.

22. Maggio A, Vitrano A, Capra M, Cuccia L, Gagliardotto F, Filosa A, et al. Improving survival with deferiprone treatment in patients with thalassemia major: a prospective multicenter randomised clinical trial under the auspices of the Italian Society for Thalassemia and Hemoglobinopathies. *Blood Cells Mol Dis* 2009;42(3):247-51.
23. Faruqi A, Amjad S, Sami AN, Hassan S, Zia Q. Electrocardiographic changes in thalassemia major patients and their association with serum ferritin levels. *JRMC* 2015;19(3):185–8.
24. Henriksen LF, Petri AS, Hasselbalch HC, Kanters JK, Ellervik C. Increased iron stores prolong the QT interval – a general population study including 20 261 individuals and meta-analysis of thalassaemia major. *Br J Haematol* 2016;174(5):776–85.
25. Advani N, Advani N, Andriastuti M. The corrected QT interval prolongation in adolescents with cardiac iron overload  $\beta$ -thalassemia major. *Turk J Pediatr* 2020;62(2):267–73.
26. Sandau KE, Funk M, Auerbach A, Barsness GW, Blum K, Cvach M, Lampert R, et al. Update to Practice Standards for electrocardiographic monitoring in hospital settings: a scientific statement from the American Heart Association. *Circulation* 2017;136(19):e273–344.
27. Kuryshev YA, Brittenham GM, Fujioka H, Kannan P, Shieh CC, Cohen SA, et al. Decreased sodium and increased transient outward potassium currents in iron-loaded cardiac myocytes: implications for the arrhythmogenesis of human siderotic heart disease. *Circulation* 1999;100(6):675–83.
28. Statters DJ, Malik M, Ward DE, Camm AJ. QT dispersion: problems of methodology and clinical significance. *J Cardiovasc Electrophysiol* 1994;5(8):672–85.
29. Surawicz B. Will QT dispersion play a role in clinical decision-making? *J Cardiovasc Electrophysiol*. 1996;7(8):777–84.
30. Demircan T, Onder Sivas Z, Tatlı Güneş B, Karadeniz C. Evaluation of electrocardiographic markers of cardiac arrhythmic events and their correlation with cardiac iron overload in patients with  $\beta$ - thalassemia major. *Cardiol Young* 2020; 30(11):1666-71.
31. Kayrak M, Acar K, Gul EE, Özbek O, Abdulhalikov T, Sonmez O, Alibasic S. The association between myocardial iron load and ventricular repolarization parameters in asymptomatic beta-thalassaemiapaitents. *Adv Hematol* 2012:170510.

32. Kardelen F, Tezcan G, Akcurin G, Ertug H, Yesilipek A. Heart rate variability in patients with thalassemia major. *Pediatr Cardiol* 2008;29(5):935–9.
33. Rutjanaprom W, Kanlop N, Charoenkwan P, Sittiwangkul R, Srichairatanakool S, Tantiworawit A, et al. Heart rate variability in beta- thalassemia patients. *Eur J Haematol* 2009;83(5):483–9.
34. Veglio F, Melchio R, Rabbia F, Molino P, Genova GC, Martini G, et al. Blood pressure and heart rate in young thalassemia major patients. *Am J Hypertens* 1998;11(5):539–47.
35. De Chiara B, Crivellaro W, Sara R, Ruffini L, Parolini M, Fesslovà V, Carnelli V, Fiorentini C, Parodi O. Early detection of cardiac dysfunction in thalassemic patients by radionuclide angiography and heart rate variability analysis. *Eur J Haematol* 2005;74(6):517–22.
36. Wang XD, Zhou L, Zhu CY, Chen B, Chen Z, Wei L. Autonomic function as indicated by heart rate deceleration capacity and deceleration runs in type 2 diabetes patients with or without essential hypertension. *Clin Interv Aging* 2018;13:1169–76.
37. Isma'eel H, Shamseddeen W, Taher A, Gharzuddine W, Dimassi A, Alam S, et al. Ventricular late potentials among thalassemia patients. *Int J Cardiol* 2009;132(3):453–5.
38. Isma'eel H, Taher A, Shamseddeen W, Khoury M, Gharzuddine W, Arnaout MS, Alam S. SAECG parameters and left ventricular chamber sizes: lesson from anemia conditions in thalassemia major patients. *Int J Cardiol* 2006;113(3):102–4.
39. Pepe A, Meloni A, Rossi G, Midiri M, Missere M, Valeri G, et al. Prediction of cardiac complications for thalassemia major in the widespread cardiac magnetic resonance era: a prospective multicentre study by a multi-parametric approach. *Eur Heart J Cardiovasc Imaging* 2018;19(3):299–309.
40. Anderson LJ, Holden S, Davis B, Prescott E, Charrier CC, Bunce NH, et al. Cardiovascular T2-star (T2\*) magnetic resonance for the early diagnosis of myocardial iron overload. *Eur Heart J* 2001;22(23):2171–9.
41. Pennell DJ, Porter JB, Cappellini MD, Chan LL, El-Beshlawy A, Aydinok Y, et al. Continued improvement in myocardial T2\* over two years of deferasirox therapy in  $\beta$ -thalassemia major patients with cardiac iron overload. *Haematologica* 2011;96(1):48–54.

## **Supporting information**

**S1 Table.** Demographic characteristics of patients with thalassemia major

**S2 Table.** Conduction patterns in the ferritin and MR-T2\*

**S3 Table.** Heart rate variability performance in the ferritin and MR-T2\* groups

**S4 Table.** SAECG measurements in the ferritin and MR-T2\* groups

**S5 Table.** Multivariate analysis between MR-T2\* values and electrophysiological properties
